# Supplementary material
Source: Springer Nature journal article supplement (https://www.springermedizin.de/resource/supplementary/12879_2014_3192_MOESM3_ESM.pdf/9446170)

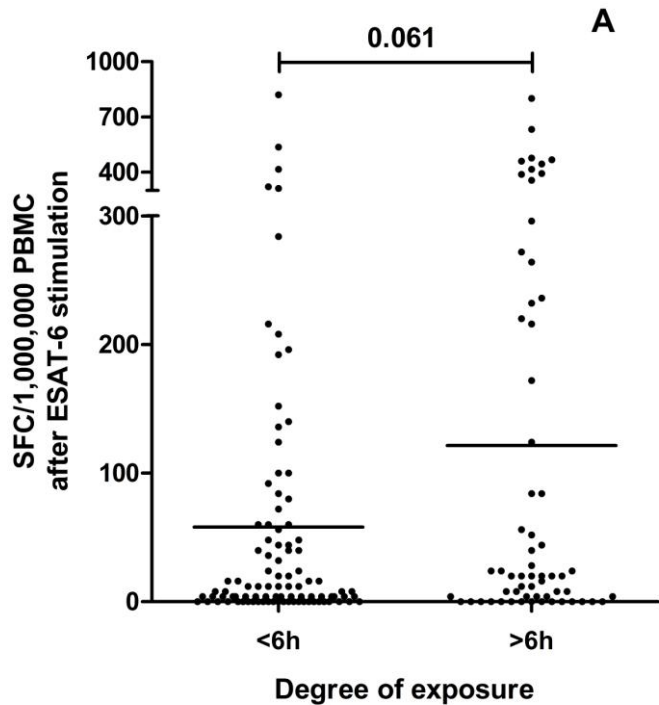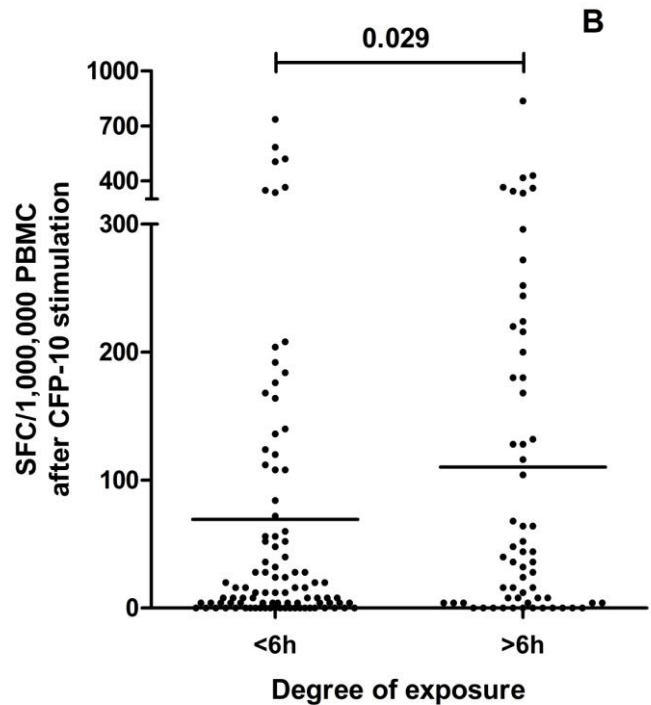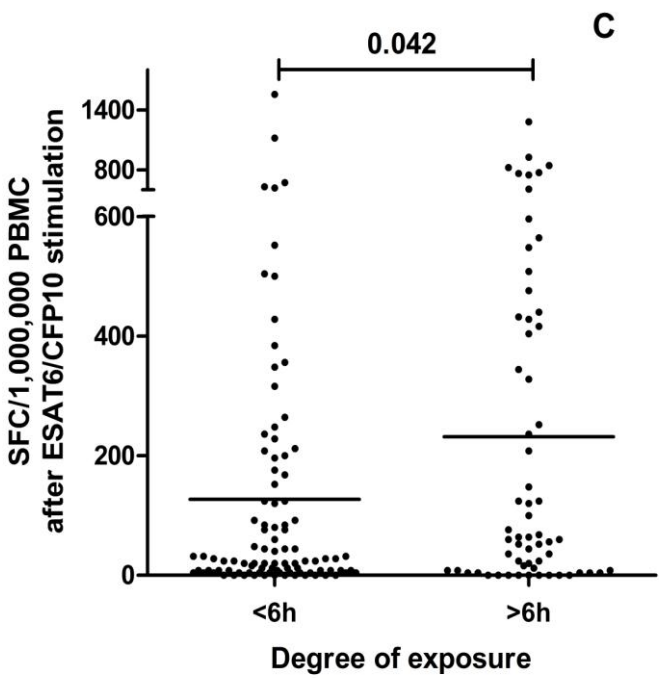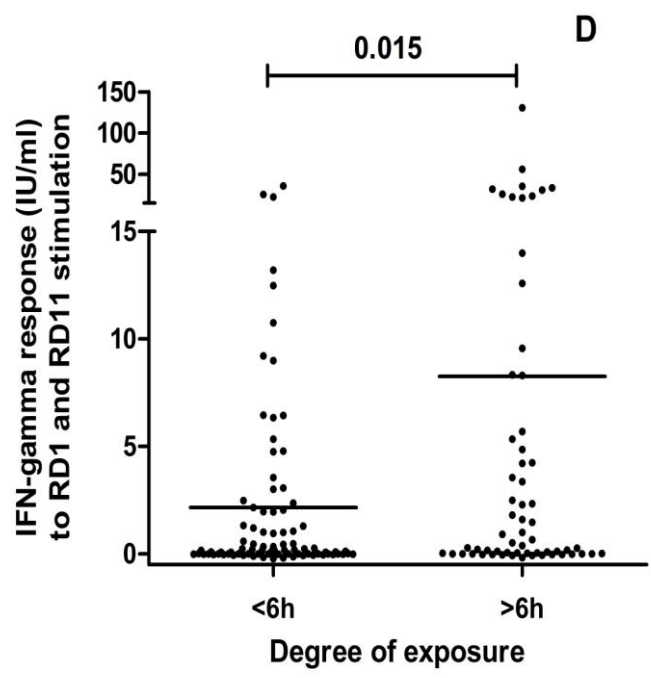

Supplement: MOESM3 [file 9446170]
